# Supplementary material
Source: Springer Nature journal article supplement (https://www.springermedizin.de/resource/supplementary/12911_2011_491_MOESM6_ESM.pdf/9525960)

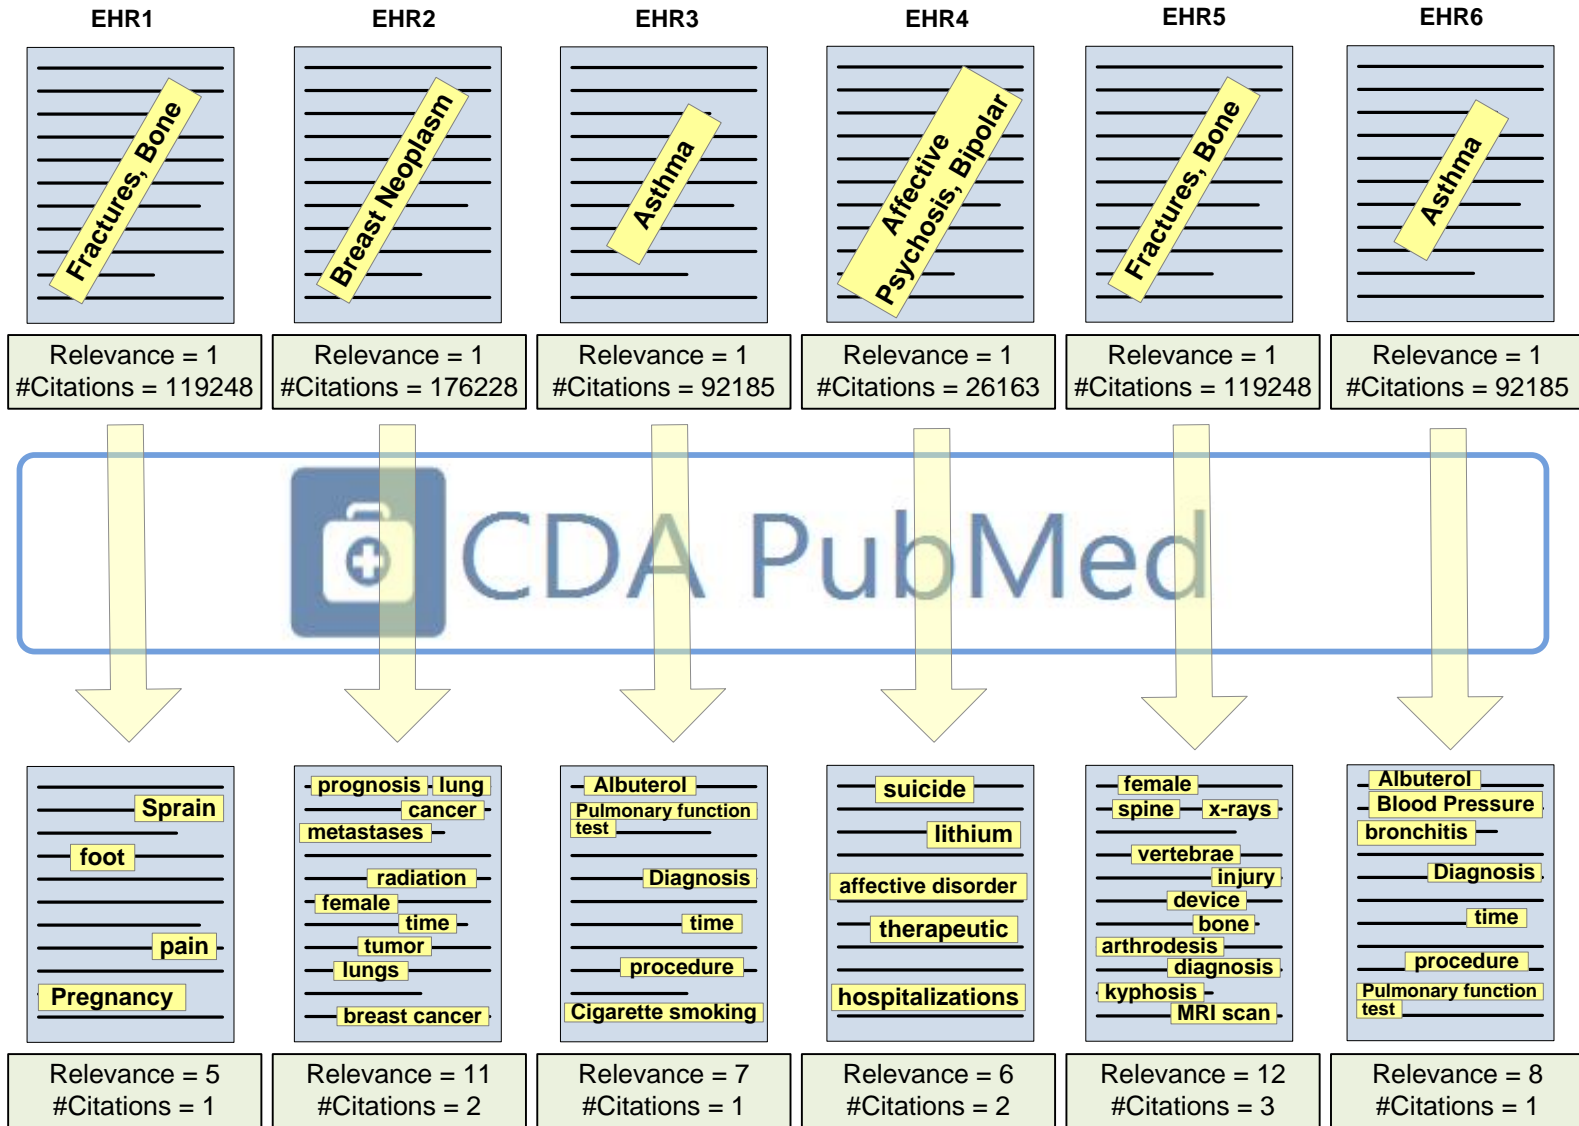

Supplement: MOESM6 [file 9525960]
